# Supplementary material for: Voltammetric and spectroscopic study of ferrocene and hexacyanoferrate and the suitability of their redox couples as internal standards in ionic liquids
Source: Royal Society of Chemistry journal article supplement (doi:10.1039/c7cp05483a), 2017-01-01
Supplement: c7cp05483a1.pdf [file c7cp05483a1.pdf]

## Voltammetric and spectroscopic study of ferrocene and hexacyanoferrate and the suitability of their redox couples as internal standards in ionic liquids

Ninett Frenzel, Jennifer Hartley and Gero Frisch

### Supporting information

Ionic liquids and deep eutectic solvents used

| name                                                            | abbreviation                             | ionic liquids                                                                                            |                     |
|-----------------------------------------------------------------|------------------------------------------|----------------------------------------------------------------------------------------------------------|---------------------|
|                                                                 |                                          | cation                                                                                                   | anion               |
| 1-ethyl-3-methyl-imidazolium acetate                            | [C <sub>2</sub> mim][ac]                 |                                                                                                          |                     |
| 1-ethyl-3-methyl-imidazolium tetrafluoroborate                  | [C <sub>2</sub> mim][BF <sub>4</sub> ]   |                                                                                                          |                     |
| 1-hexyl-3-methyl-imidazolium chloride                           | [C <sub>6</sub> mim][Cl]                 |                                                                                                          | Cl <sup>-</sup>     |
| 1-butyl-3-methyl-imidazolium dicyanamide                        | [C <sub>4</sub> mim][DCN]                |                                                                                                          |                     |
| 1-ethyl-3-methyl-imidazolium diethylphosphate                   | [C <sub>2</sub> mim][DEP]                |                                                                                                          |                     |
| 1-ethyl-3-methyl-imidazolium ethylsulfate                       | [C <sub>2</sub> mim][EtSO <sub>4</sub> ] |                                                                                                          |                     |
| 1-butyl-3-methyl-imidazolium hydrogensulfate                    | [C <sub>4</sub> mim][HSO <sub>4</sub> ]  | R = ethyl ≡ [C <sub>2</sub> mim]<br>R = butyl ≡ [C <sub>4</sub> mim]<br>R = hexyl ≡ [C <sub>6</sub> mim] |                     |
| 1-ethyl-3-methyl-imidazolium bis(trifluoromethylsulfonyl)-imide | [C <sub>2</sub> mim][NTf <sub>2</sub> ]  |                                                                                                          |                     |
| 1-ethyl-3-methyl-imidazolium triflate                           | [C <sub>2</sub> mim][OTf]                |                                                                                                          |                     |
| 1-butyl-3-methyl-imidazolium hexafluorophosphate                | [C <sub>4</sub> mim][PF <sub>6</sub> ]   |                                                                                                          |                     |
| 1-ethyl-3-methyl-imidazolium thiocyanate                        | [C <sub>2</sub> mim][SCN]                |                                                                                                          | S <sup>-</sup> -C≡N |
| ethylammonium nitrate                                           | [EtA][NO <sub>3</sub> ]                  |                                                                                                          |                     |

| name      | Deep Eutectic Solvents                                                             |                                                                                     |
|-----------|------------------------------------------------------------------------------------|-------------------------------------------------------------------------------------|
|           | quaternary ammonium salt                                                           | hydrogen-bond donor                                                                 |
| Ethaline  | 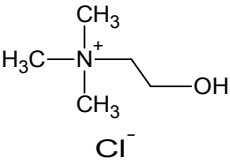 |  |
| Propaline |                                                                                    |  |
| Glyceline |                                                                                    |  |

Electrochemical parameters modelled with DigiElch for the formal potential  $\Delta E$  vs Ag-wire, charge transfer coefficient  $\alpha$ , rate constant  $k_s$ , diffusion coefficient  $D$  and standard deviation of the fit  $S$ , and calculated values for the peak potential separation  $\Delta E_p$  and peak current ratio  $I_{pa}/I_{pc}$  for samples of 10 mM ferrocene in various ILs, on a Pt, GC and Au working electrode and water content in wt% for each solution after dissolving process determined by Karl-Fisher titration.

| <b>Ionic liquid</b>                      |    | $\Delta E / V$<br>(DigiElch) | $\Delta E_p / mV$<br>(from 5 to 100 mV s <sup>-1</sup> ) | $\alpha$ | $I_{pa}/I_{pc}$<br>(from 5 to 100 mV s <sup>-1</sup> ) | $k_s / cm\ s^{-1} \cdot 10^{-4}$ | $D / cm^2\ s^{-1} \cdot 10^{-8}$<br>(DigiElch) | $S / \%$ | $H_2O\ content / wt\%$ |
|------------------------------------------|----|------------------------------|----------------------------------------------------------|----------|--------------------------------------------------------|----------------------------------|------------------------------------------------|----------|------------------------|
| [C <sub>2</sub> mim][BF <sub>4</sub> ]   | Pt | 0.4615(4)                    | 68-74                                                    | 0.78(3)  | 0.98-1.00                                              | 15.8(9)                          | 17.1(1)                                        | 2.38     | 1.2                    |
|                                          | GC | 0.4616(4)                    | 68-70                                                    | 0.82(3)  | 0.98-1.00                                              | 15.5(9)                          | 15.6(3)                                        | 2.19     |                        |
|                                          | Au | 0.4576(9)                    | 68-70                                                    | 0.79(4)  | 1.00-1.01                                              | 15(1)                            | 31.5(9)                                        | 4.14     |                        |
| [C <sub>4</sub> mim][DCN]                | Pt | 0.6718(6)                    | 72-82                                                    | 0.47(4)  | 1.04-1.02                                              | 12.9(9)                          | 26.7(3)                                        | 2.13     | 0.92                   |
|                                          | GC | 0.6542(7)                    | 72-76                                                    | 0.50(4)  | 1.03-1.02                                              | 14(1)                            | 25.8(3)                                        | 1.81     |                        |
|                                          | Au | 0.6438(5)                    | 74-78                                                    | 0.44(2)  | 1.27-1.03                                              | 12.8(5)                          | 33.2(2)                                        | 1.76     |                        |
| [C <sub>2</sub> mim][EtSO <sub>4</sub> ] | Pt | 0.0404(2)                    | 72-102                                                   | 0.51(2)  | 0.99-1.00                                              | 8.2(2)                           | 20.1(1)                                        | 1.50     | 1.89                   |
|                                          | GC | 0.0423(3)                    | 74-104                                                   | 0.50(2)  | 1.01-1.00                                              | 8.5(3)                           | 19.3(1)                                        | 1.69     |                        |
|                                          | Au | 0.0442(4)                    | 70-80                                                    | 0.58(4)  | 1.01-0.97                                              | 13.5(9)                          | 24.4(2)                                        | 2.78     |                        |
| [C <sub>4</sub> mim][HSO <sub>4</sub> ]  | Pt | 0.531(2)                     | 76-138                                                   | 0.59(3)  | 0.94-0.95                                              | 0.43(2)                          | 0.087(1)                                       | 3.56     | 0.40                   |
|                                          | GC | 0.5377(6)                    | 76-142                                                   | 0.58(3)  | 1.02-0.97                                              | 0.51(3)                          | 0.156(2)                                       | 3.98     |                        |
| [C <sub>2</sub> mim][NTf <sub>2</sub> ]  | Pt | 0.1793(8)                    | 74-84                                                    | 0.53(2)  | 1.00-1.01                                              | 11.4(4)                          | 23.6(4)                                        | 1.76     | 0.14                   |
|                                          | GC | 0.1748(8)                    | 70-76                                                    | 0.50(6)  | 0.99-1.00                                              | 14.7(7)                          | 23.2(3)                                        | 1.87     |                        |
|                                          | Au | 0.1687(4)                    | 78-76                                                    | 0.74(3)  | 0.99-1.01                                              | 13.6(7)                          | 33.5(4)                                        | 2.94     |                        |
| [C <sub>2</sub> mim][OTf]                | Pt | 0.3700(4)                    | 70-88                                                    | 0.51(2)  | 0.99-1.01                                              | 13.2(4)                          | 40.1(2)                                        | 1.91     | 0.82                   |
|                                          | GC | 0.3645(3)                    | 70-82                                                    | 0.51(2)  | 1.04-1.00                                              | 13.4(5)                          | 37.1(2)                                        | 2.07     |                        |
|                                          | Au | 0.3522(2)                    | 70-76                                                    | 0.49(2)  | 1.07-1.02                                              | 16.7(9)                          | 41.1(2)                                        | 1.65     |                        |
| [C <sub>4</sub> mim][PF <sub>6</sub> ]   | Pt | 0.170(1)                     | 82-132                                                   | 0.53(3)  | 0.99-1.01                                              | 3.6(3)                           | 14.3(2)                                        | 2.57     | 0.37                   |
|                                          | GC | 0.1840(4)                    | 82-152                                                   | 0.49(1)  | 0.99-1.00                                              | 3.6(1)                           | 12.2(1)                                        | 2.39     |                        |
|                                          | Au | 0.2003(6)                    | 70-84                                                    | 0.69(4)  | 0.98-1.00                                              | 14(1)                            | 16.6(4)                                        | 3.05     |                        |
| [EtA][NO <sub>3</sub> ]                  | Pt | 0.0972(3)                    | 70-74                                                    | 0.52(4)  | 1.00-1.01                                              | 11.1(9)                          | 32.6(4)                                        | 2.92     | 2.49                   |
|                                          | GC | 0.0954(3)                    | 68-72                                                    | 0.51(3)  | 1.01-1.04                                              | 14.4(5)                          | 26.4(3)                                        | 1.91     |                        |
|                                          | Au | 0.096(1)                     | 68-70                                                    | 0.85(6)  | 1.01-1.00                                              | 13(2)                            | 35.4(9)                                        | 2.76     |                        |

Simulated values with DigiElch for the formal potential  $\Delta E$  vs 100 mM AgCl/Ag for the chloride based liquids and vs Ag for the other ILs, charge transfer coefficient  $\alpha$ , rate constant  $k_s$ , diffusion coefficient  $D$  and standard deviation of the fit  $S$ , and calculated values for the peak potential separation  $\Delta E_p$  and peak current ratio  $I_{pa}/I_{pc}$  for samples of 10 mM  $K_3[Fe(CN)_6]$  in various ILs, on a Pt, GC and Au working electrode and water content in wt% for each solution after dissolving process determined by Karl-Fisher titration.

| <b>Ionic solvent</b>                    |    | $\Delta E / V$<br>(DigiElch) | $\Delta E_p / mV$<br>(from 5 to 100 mV s <sup>-1</sup> ) | $\alpha$ | $I_{pa}/I_{pc}$<br>(from 5 to 100 mV s <sup>-1</sup> ) | $k_s / cm\ s^{-1} \cdot 10^{-4}$ | $D / cm^2\ s^{-1} \cdot 10^{-8}$<br>(DigiElch) | $S / \%$ | <b>H<sub>2</sub>O content /<br/>wt%</b> |
|-----------------------------------------|----|------------------------------|----------------------------------------------------------|----------|--------------------------------------------------------|----------------------------------|------------------------------------------------|----------|-----------------------------------------|
| Ethaline                                | Pt | 0.0896(3)                    | 70-80                                                    | 0.63(2)  | 1.03-1.00                                              | 7.6(3)                           | 10.16(5)                                       | 1.87     | 1.18                                    |
|                                         | GC | 0.0928(2)                    | 70-78                                                    | 0.56(1)  | 1.01-0.99                                              | 5.0(1)                           | 8.73(2)                                        | 1.76     |                                         |
|                                         | Au | 0.0953(7)                    | 70-76                                                    | 0.81(2)  | 1.01-0.95                                              | 5.4(3)                           | 11.1(2)                                        | 4.35     |                                         |
| Propaline                               | Pt | 0.0604(4)                    | 72-88                                                    | 0.52(2)  | 0.97-1.00                                              | 3.8(4)                           | 4.32(3)                                        | 2.51     | 1.23                                    |
|                                         | GC | 0.0632(3)                    | 72-82                                                    | 0.49(2)  | 1.00-1.01                                              | 5.0(2)                           | 3.98(3)                                        | 2.26     |                                         |
|                                         | Au | 0.0670(6)                    | 74-84                                                    | 0.84(2)  | 0.99-0.94                                              | 3.9(2)                           | 6.70(9)                                        | 3.00     |                                         |
| Glyceline                               | Pt | 0.0964(3)                    | 72-94                                                    | 0.50(2)  | 1.03-1.00                                              | 1.80(6)                          | 1.066(7)                                       | 2.31     | 0.72                                    |
|                                         | GC | 0.0971(3)                    | 70-90                                                    | 0.49(2)  | 1.01-1.00                                              | 2.2(1)                           | 1.035(7)                                       | 2.47     |                                         |
|                                         | Au | 0.0995(5)                    | 70-84                                                    | 0.43(4)  | 1.12-0.98                                              | 1.39(2)                          | 1.39(2)                                        | 3.93     |                                         |
| [C <sub>2</sub> mim][ac]                | Pt | 0.1144(3)                    | 72-95                                                    | 0.47(2)  | 0.98-0.97                                              | 4.3(2)                           | 5.21(3)                                        | 1.75     | 3.19                                    |
|                                         | GC | 0.1185(2)                    | 70-80                                                    | 0.47(3)  | 0.98-0.97                                              | 5.9(2)                           | 5.17(3)                                        | 1.61     |                                         |
|                                         | Au | 0.1308(7)                    | 76-114                                                   | 0.68(2)  | 0.96-1.09                                              | 3.2(2)                           | 10.6(2)                                        | 4.8      |                                         |
| [C <sub>2</sub> mim][BF <sub>4</sub> ]  | Pt | -0.2085(5)                   | 68-80                                                    | 0.51(5)  | 1.00-0.97                                              | 8.0(4)                           | 11.6(1)                                        | 2.53     | 0.56                                    |
|                                         | GC | -0.217(1)                    | 72-82                                                    | 0.52(8)  | 0.99-1.00                                              | 5.2(8)                           | 11.1(3)                                        | 4.33     |                                         |
|                                         | Au | -0.1964(9)                   | 74-84                                                    | 0.83(4)  | 0.89-1.05                                              | 7.5(9)                           | 20.0(4)                                        | 6.60     |                                         |
| [C <sub>6</sub> mim][Cl]                | Pt | 0.002(2)                     | 108-240                                                  | 0.57(2)  | 0.83-0.76                                              | 0.077(7)                         | 0.037(1)                                       | 9.21     | 1.05                                    |
|                                         | GC | 0.017(2)                     | 110-270                                                  | 0.52(2)  | 0.75-0.77                                              | 0.10(2)                          | 0.072(3)                                       | 8.44     |                                         |
|                                         | Au | 0.021(2)                     | 98-130                                                   | 0.58(3)  | 0.90-0.89                                              | 0.19(2)                          | 0.091(3)                                       | 8.12     |                                         |
| [C <sub>2</sub> mim][DEP]               | Pt | -0.0159(5)                   | 82-130                                                   | 0.66(1)  | 0.84-0.78                                              | 1.08(3)                          | 1.73(2)                                        | 2.78     | 1.66                                    |
|                                         | GC | -0.0110(4)                   | 74-116                                                   | 0.59(2)  | 0.85-0.82                                              | 1.74(6)                          | 1.62(1)                                        | 2.39     |                                         |
|                                         | Au | -0.0148(6)                   | 90-185                                                   | 0.62(1)  | 0.86-0.55                                              | 0.65(2)                          | 1.76(2)                                        | 3.44     |                                         |
| [C <sub>4</sub> mim][HSO <sub>4</sub> ] | Pt | 0.48(1)                      | 120-260                                                  | 0.58(1)  | 0.56-0.41                                              | 0.074(3)                         | 0.029(1)                                       | 5.20     | 0.53                                    |
|                                         | GC | 0.479(1)                     | 120-164                                                  | 0.53(3)  | 0.70-0.54                                              | 0.21(1)                          | 0.048(2)                                       | 6.05     |                                         |
| [C <sub>2</sub> mim][SCN]*              | Pt | 0.3664(5)                    | 114-138                                                  | 0.53(1)  | 0.85-0.93                                              | 1.16(3)                          | 6.48(6)                                        | 2.08     | 0.75                                    |
| [EtA][NO <sub>3</sub> ]                 | Pt | 0.0012(3)                    | 68-76                                                    | 0.44(2)  | 0.98-0.96                                              | 9.5(4)                           | 17.0(1)                                        | 1.71     | 1.23                                    |
|                                         | GC | 0.0093(4)                    | 68-76                                                    | 0.46(2)  | 1.00-0.98                                              | 9.8(3)                           | 16.9(2)                                        | 1.77     |                                         |
|                                         | Au | 0.0160(5)                    | 68-76                                                    | 0.66(3)  | 1.03-0.99                                              | 11.1(5)                          | 21.7(1)                                        | 2.38     |                                         |

\*calculated values for  $K_3[Fe(CN)_6]$  in [C<sub>2</sub>mim][SCN] from a 1 mM solution with sweep rates from 5 to 20 mV s<sup>-1</sup>
